# Supplementary material for: Controlling the steepness of gate-opening behavior on elastic layer-structured metal–organic framework-11 via solvent-mediated phase transformation
Source: Royal Society of Chemistry journal article supplement (doi:10.1039/d4ta02068e), 2024-01-01
Supplement: d4ta02068e1.pdf [file d4ta02068e1.pdf]

Supporting Information:

Controlling the Steepness of Gate–Opening  
Behavior on Elastic Layer-Structured  
Metal–Organic Framework-11 via  
Solvent-Mediated Phase Transformation

Shotaro Hiraide,\* Keisuke Nishimoto, and Satoshi Watanabe\*

*Department of Chemical Engineering, Kyoto University, Nishikyo, Kyoto 615-8510, Japan*

E-mail: hiraide@cheme.kyoto-u.ac.jp; nabe@cheme.kyoto-u.ac.jp

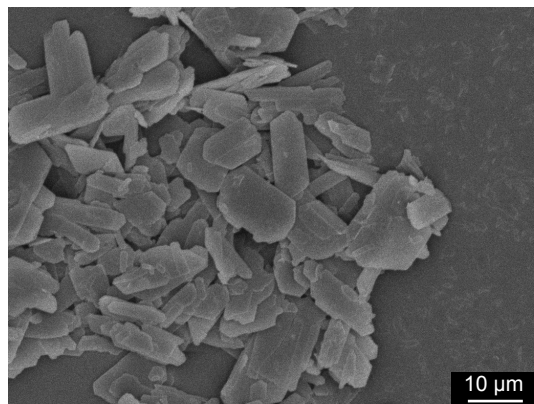

Figure S1: SEM image of particles obtained through low-concentration synthesis.

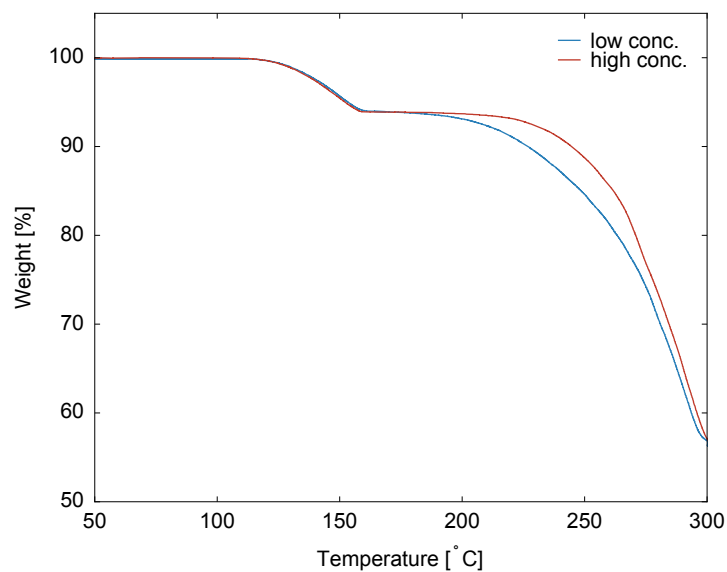

Figure S2: Thermogravimetric analysis (TGA) profiles of pre-ELM-11 synthesized under high- and low-concentration conditions. TGA was conducted using a DTG-60H thermogravimetric analyzer (Shimadzu Corp., Japan) under a nitrogen flow of 50 ml/min at a heating rate of 3 °C/min up to 300 °C.

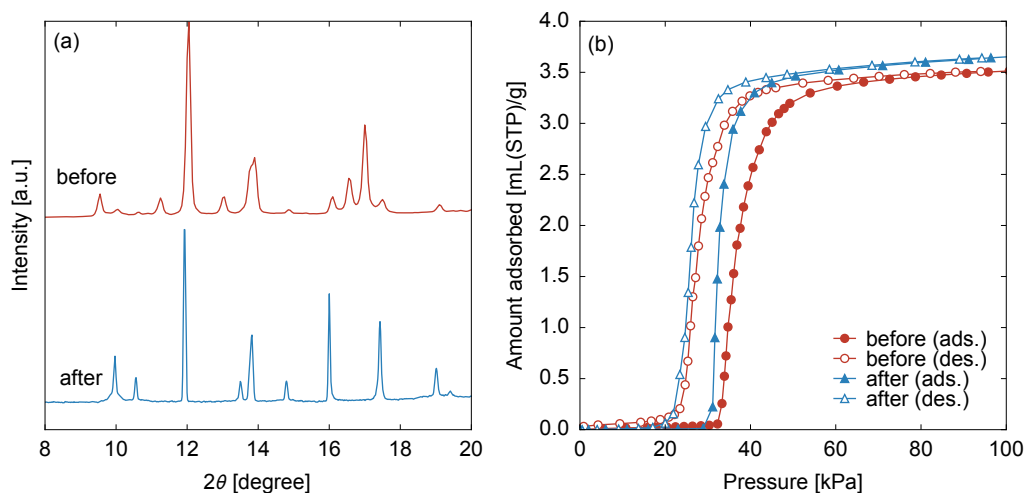

Figure S3: Changes in (a) the XRD pattern of pre-ELM-11 and (b) the CO<sub>2</sub> adsorption isotherm on ELM-11 at 273 K following re-immersion in a methanol–water solvent. The term “before” refers to the particles with an aging time of 24 h shown in Figure 2. In this experiment, the particles were immersed in a methanol–water solvent for one week, where the quantity of particles used was determined to achieve the same concentration as that in the synthesis under high concentration conditions if all the pre-ELM-11 added dissolved.

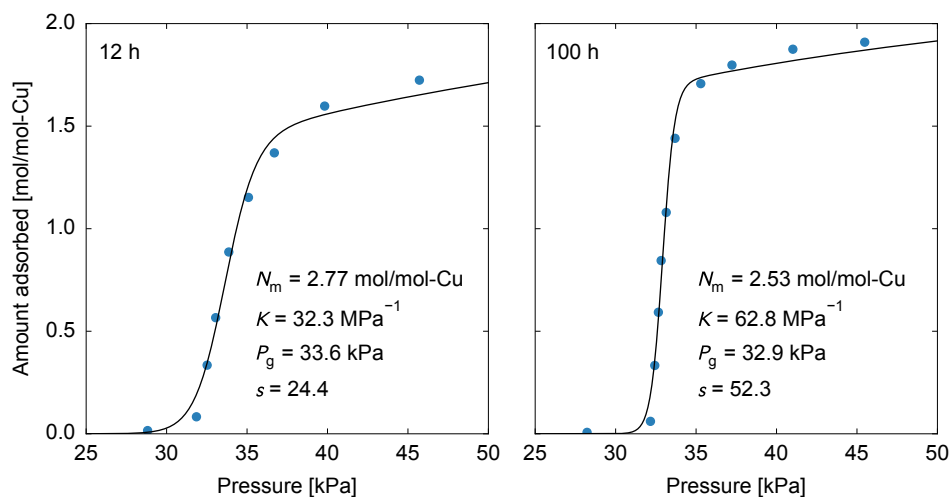

Figure S4: CO<sub>2</sub> adsorption isotherms on ELM-11 at 273 K with aging times of 12 h and 100 h (blue markers) and the STA equations fitted to them (black lines).

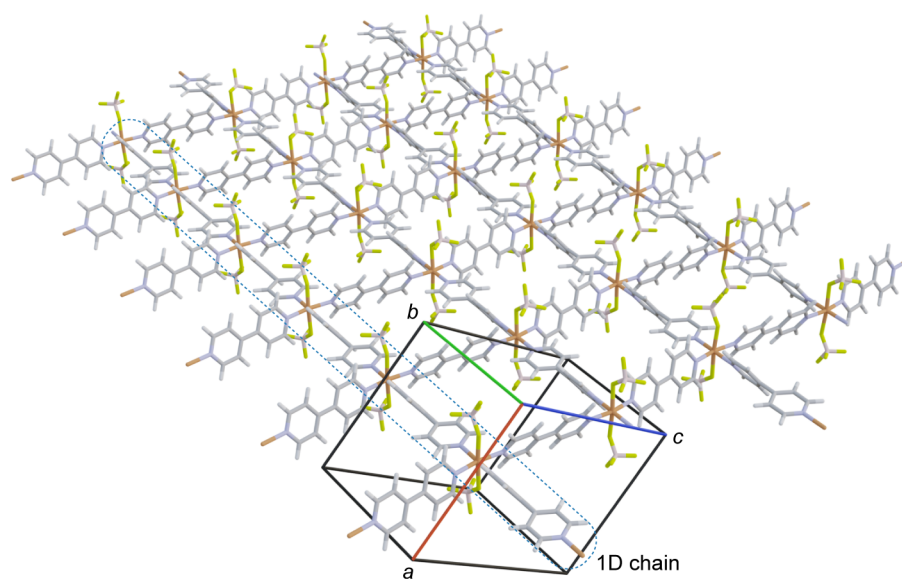

Figure S5: The relationship between the layer structure of ELM-11 and its conventional cell.
